# Supplementary material for: Isostructurality in six celecoxib co-crystals introduced by solvent inclusion
Source: Royal Society of Chemistry journal article supplement (doi:10.1039/c4ce01854k), 2014-10-06
Supplement: c4ce01854k1.pdf [file c4ce01854k1.pdf]

Supplementary Information

# Isostructurality in Six Celecoxib Co-crystals Introduced by a Solvent Inclusion

Xiaojuan Wang<sup>ab</sup>, Qi Zhang<sup>b</sup>, Linglei Jiang<sup>b</sup>, Yun Xu<sup>b</sup> and Xue feng Mei<sup>\*b</sup>

<sup>a</sup> *College of Pharmacy, Nanchang University, Nanchang 330006, China*

<sup>b</sup> *Pharmaceutical Analytical & Solid-State Chemistry Research Center, Shanghai*

*Institute of Materia Medica, Chinese Academy of Sciences, Shanghai 201203, China*

*E-mail address: xuefengmei@simm.ac.cn (X. Mei); fax: +86-21-50807088; Tel: +86-21-50800934*

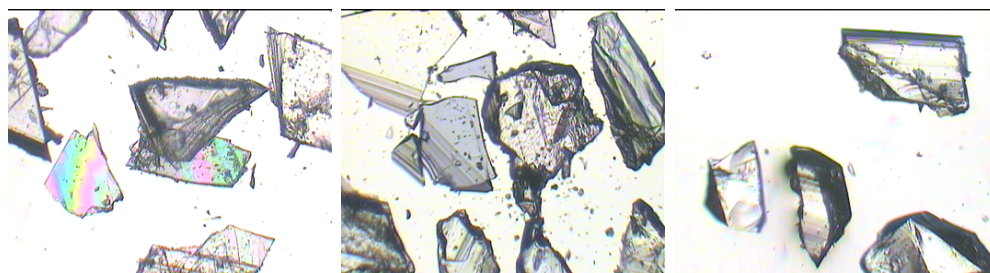

CEL-BPY (1)

CEL-DPE (2)

CEL-BPE (3)

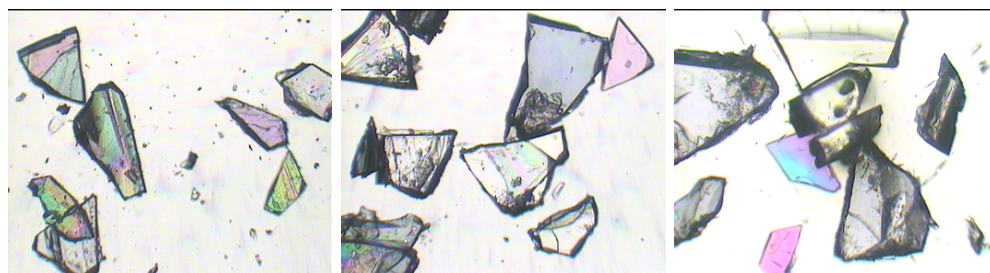

S1a

S1b

S1c

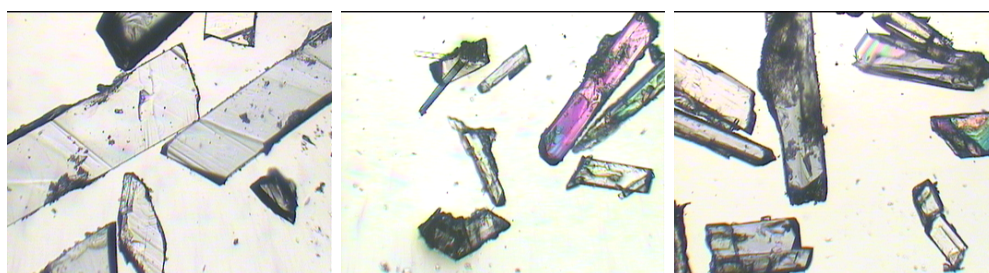

S2a

S2b

S2c

**Fig. S1** HSM photographs of CEL unsolvated co-crystals and their solvates

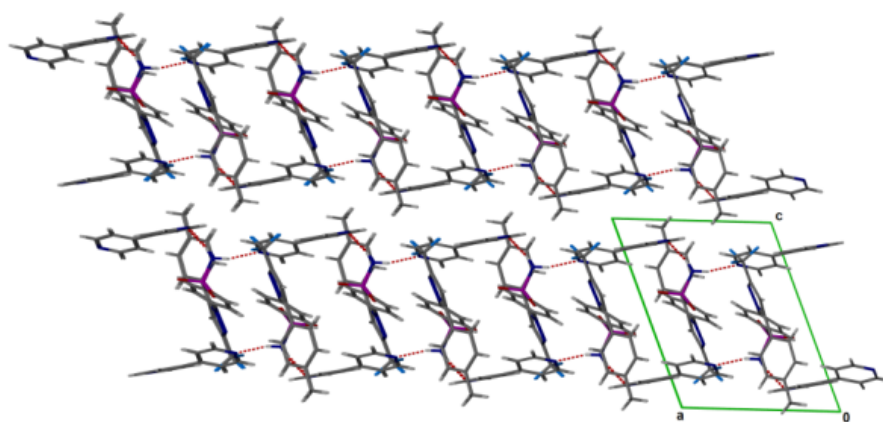

(a)

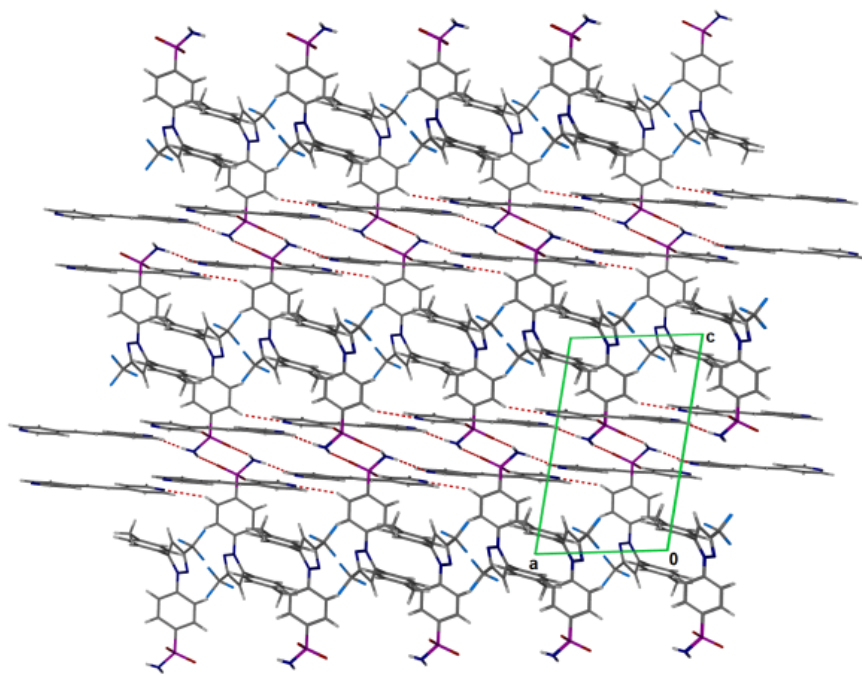

(b)

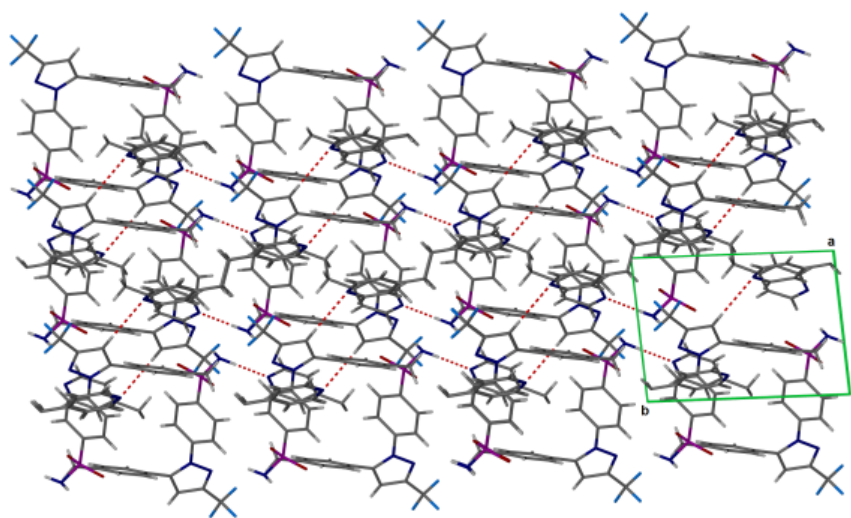

(c)

**Fig. S2** Distinctive 2D packing structures of (a) CEL-BPY, (b) CEL-DPE, (c) CEL-BPE

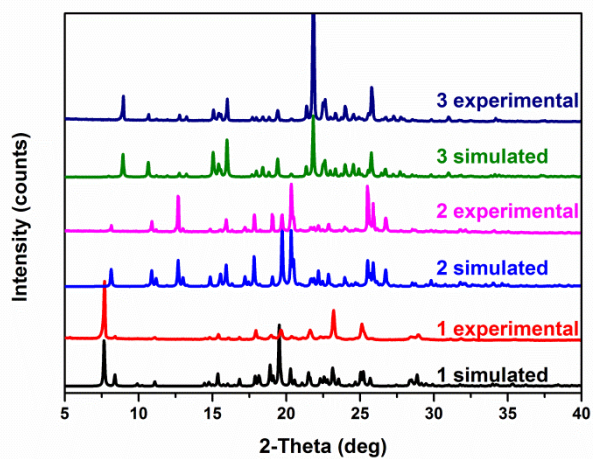

(a)

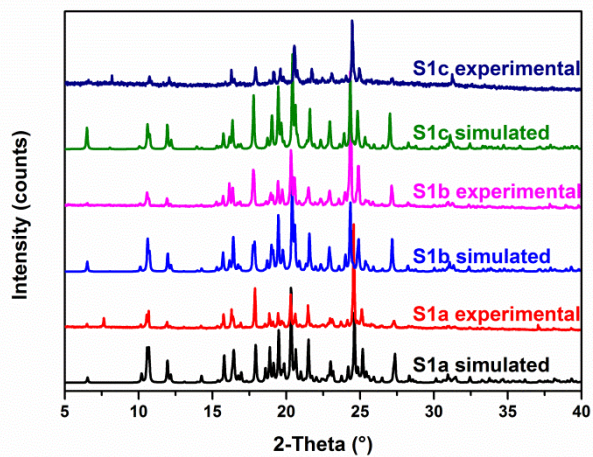

(b)

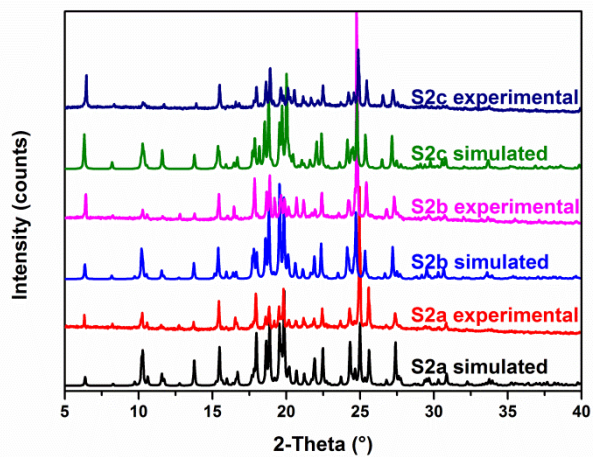



(c)

**Fig. S3** Simulated and experimental XRPD patterns of CEL unsolvated co-crystals and their solvates

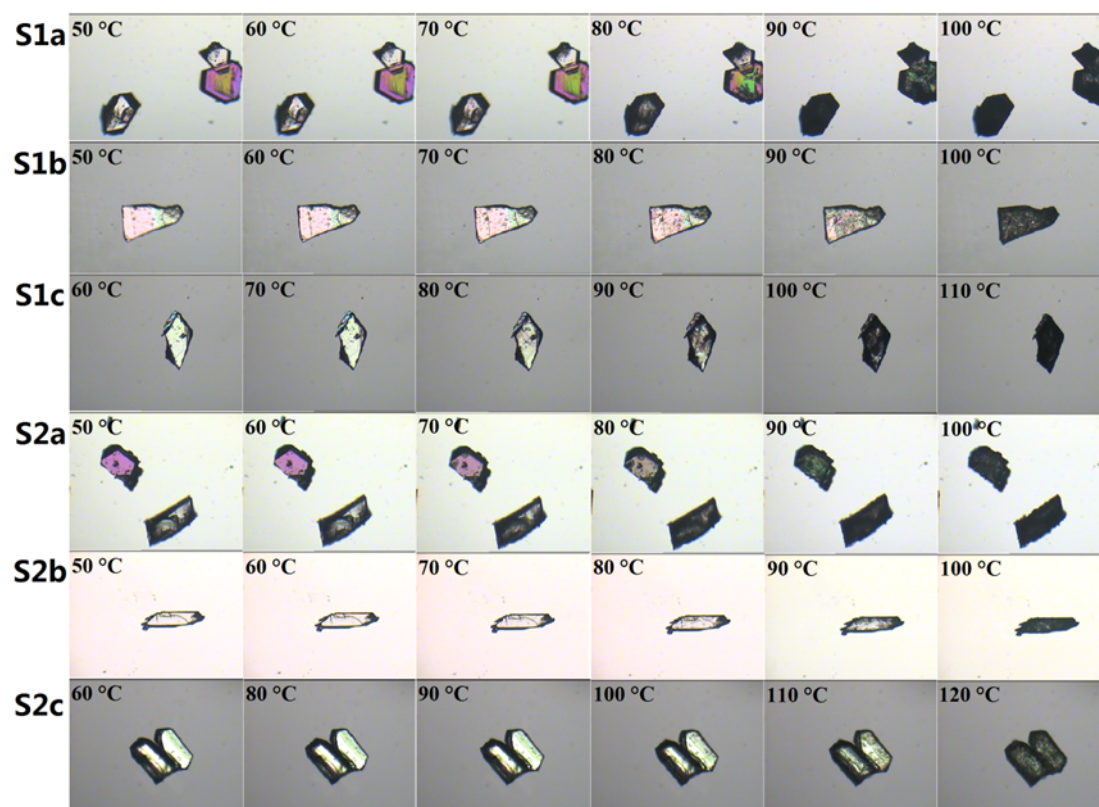

**Fig. S4** HSM photographs of six co-crystal solvates at different temperatures

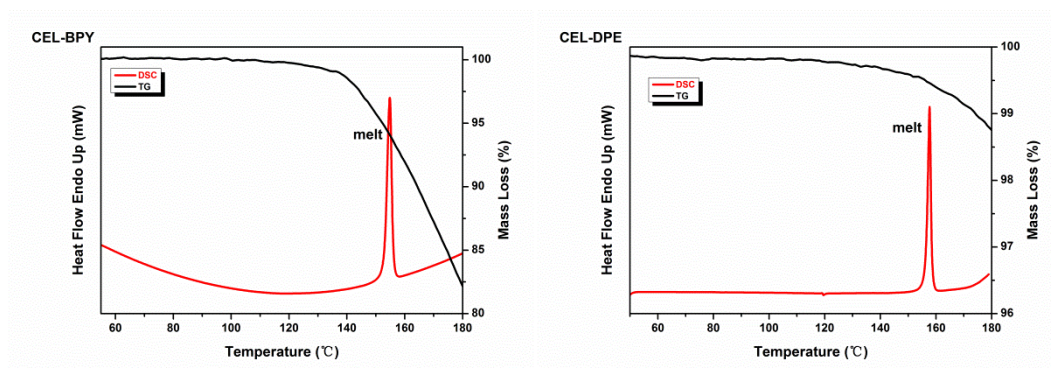

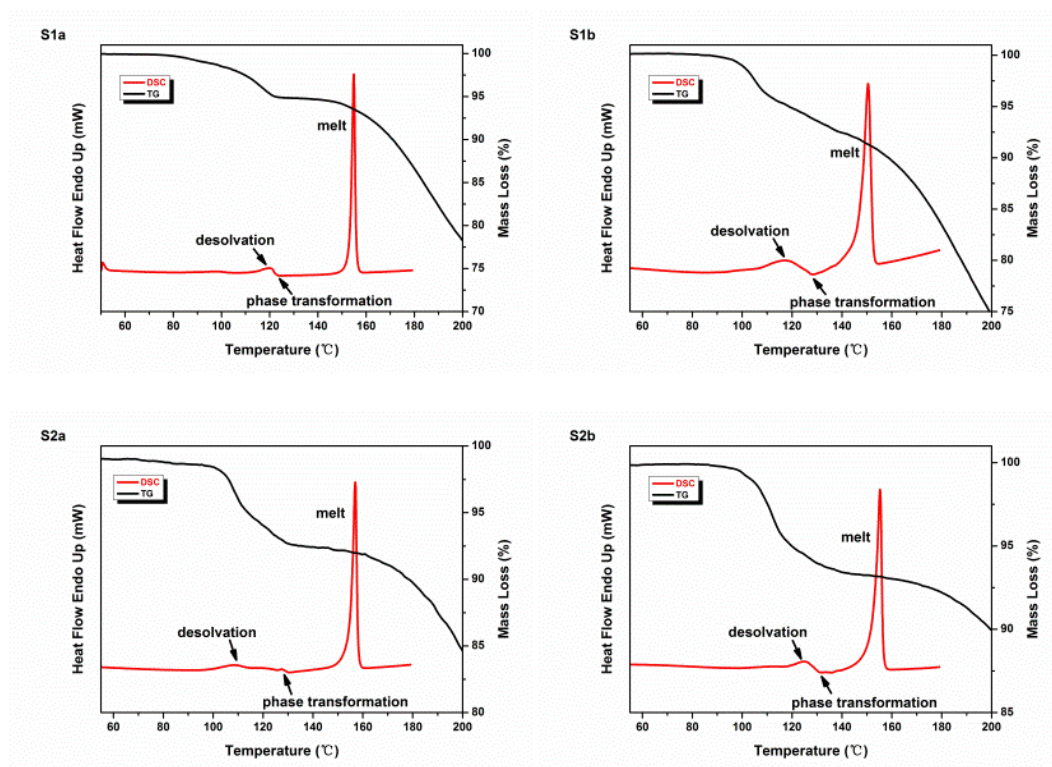

**Fig. S5** DSC and TGA thermograms of CEL co-crystals

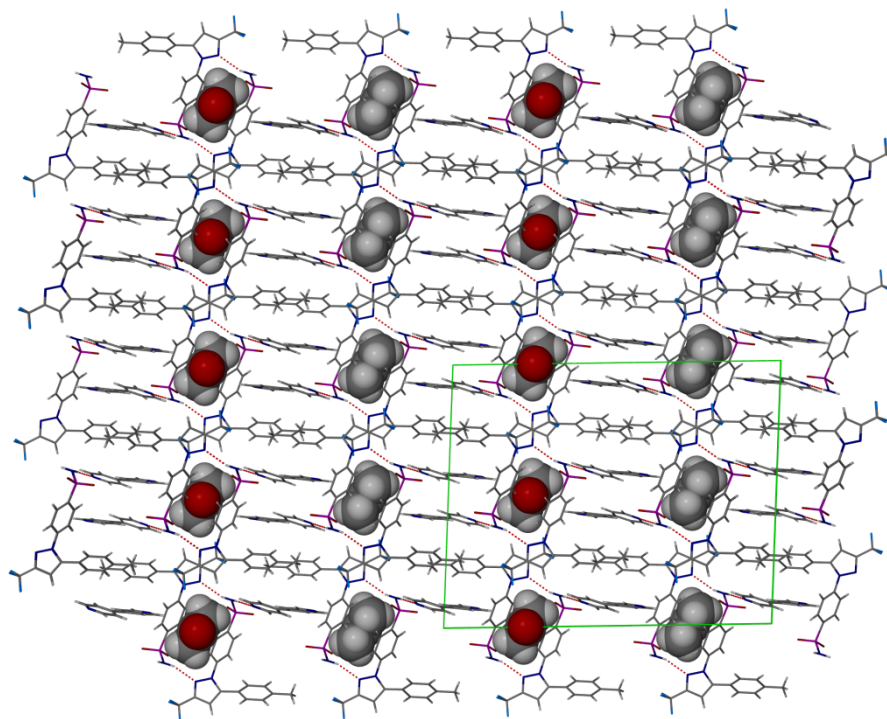

(a)

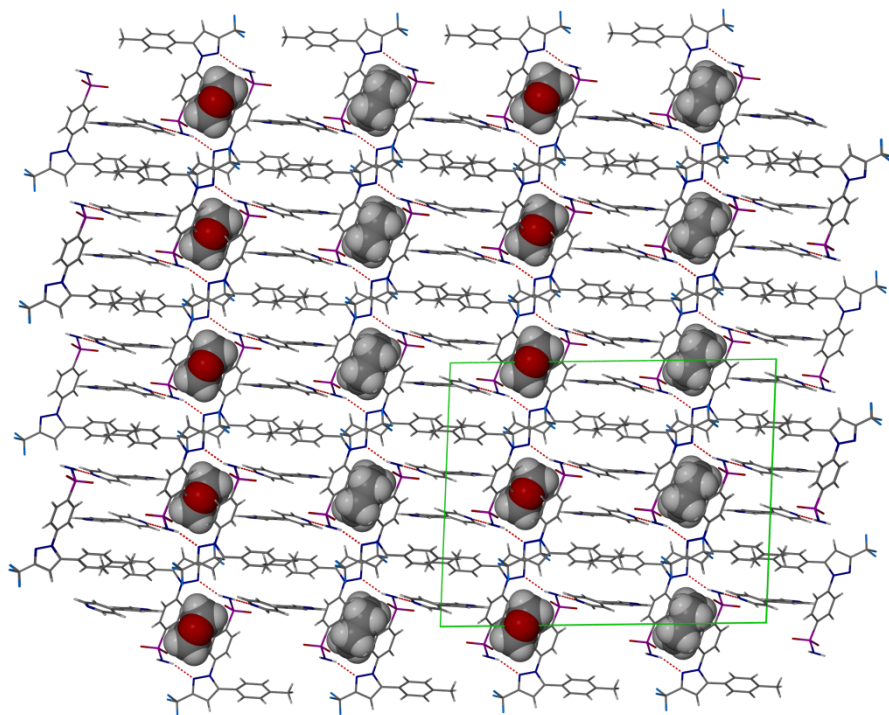

(b)

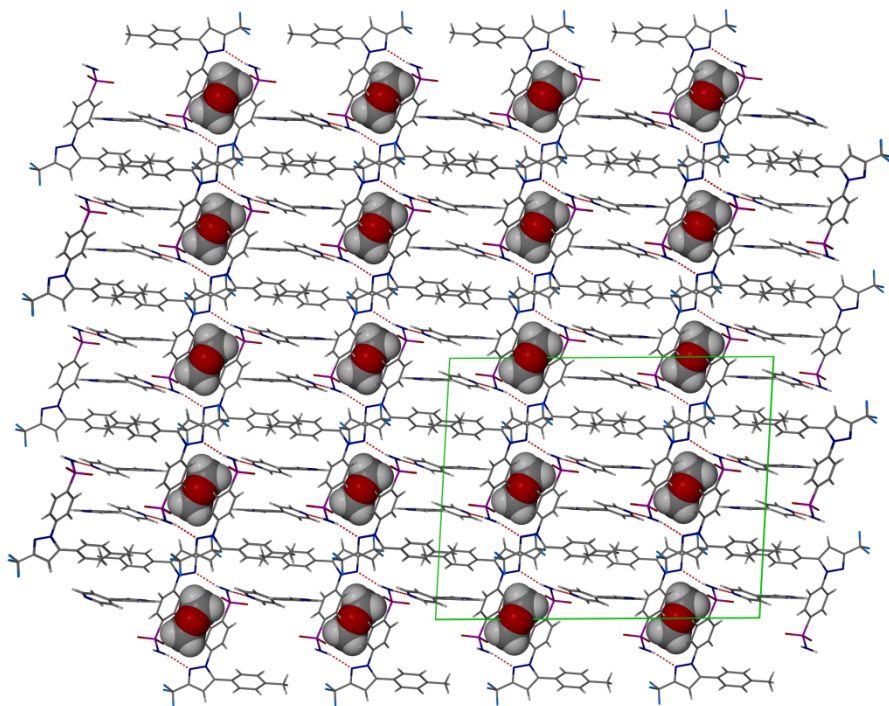

(c)



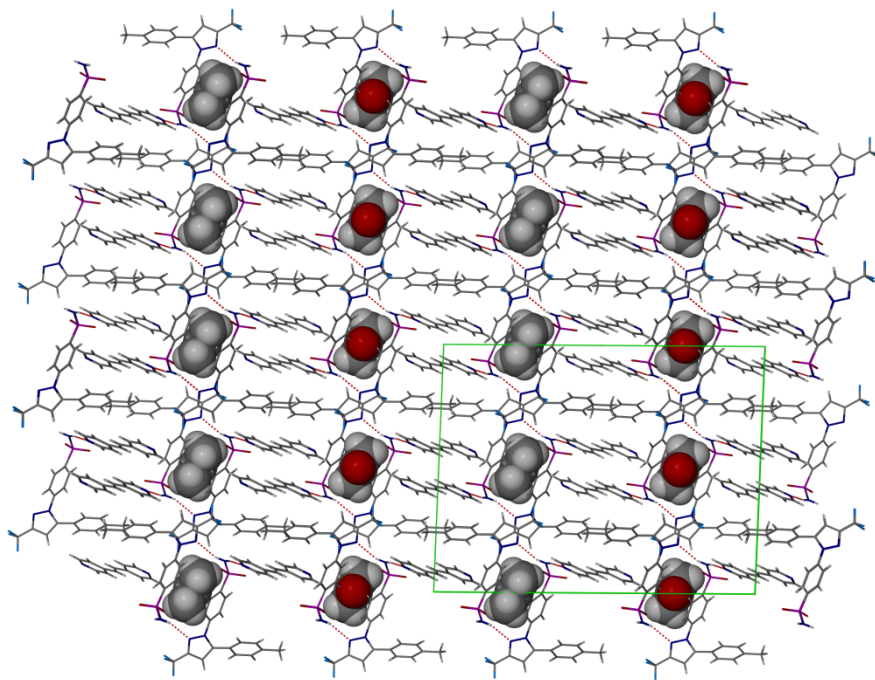

(d)

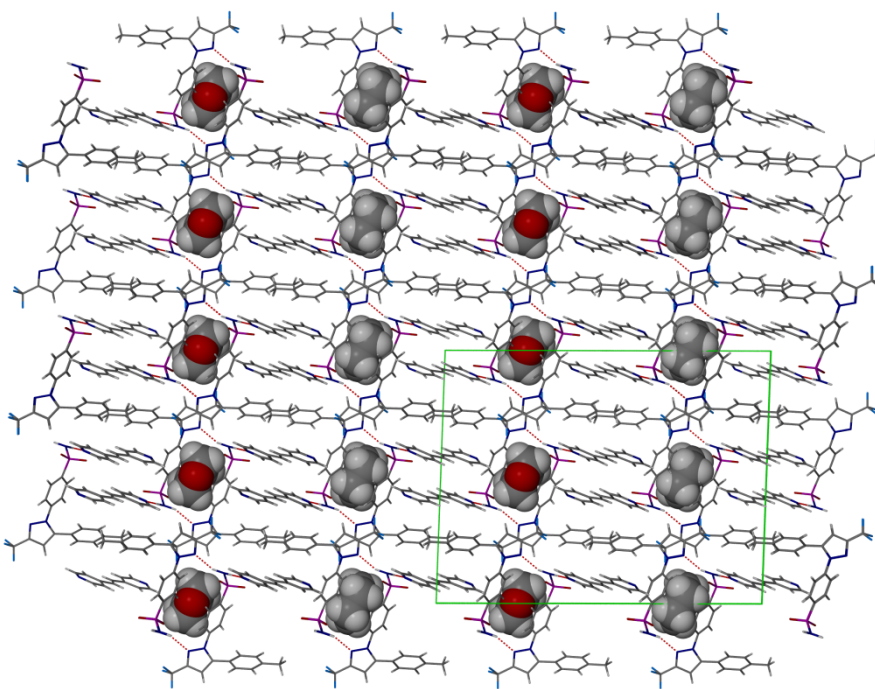

(e)



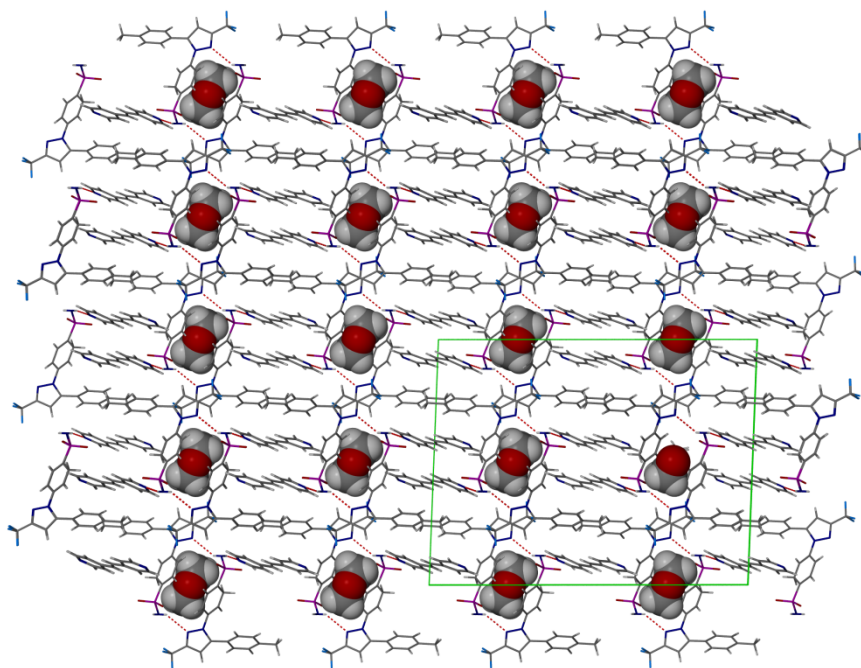

(f)

**Fig. S6** Three-dimension packing diagram (view down b-axis) of CEL co-crystal solvates (a) S1a, (b) S1b, (c) S1c, (d) S2a, (e) S2b, (f) S2c.
